# Supplementary material for: SNP-based high density genetic map and mapping of btwd1 dwarfing gene in barley
Source: PubMed Central journal article supplement (PMC4987670; doi:10.1038/srep31741), 2016-08-17
Supplement: srep31741-s1.pdf [file srep31741-s1.pdf]

## **Supplementary Information**

“SNP-based high density genetic map and mapping of *btwd1* dwarfing gene in barley”

Xifeng Ren, Jibin Wang, Lipan Liu, Genlou Sun, Chengdao Li, Hong Luo,  
Dongfa Sun

### **Supplementary Table S1**

**Table S1.** Markers and distances of barley genetic linkage map

**Supplementary Table S1**

| 1H          |          | 2H           |          | 3H           |          | 4H            |          | 5H           |          | 6H            |          | 7H            |          |
|-------------|----------|--------------|----------|--------------|----------|---------------|----------|--------------|----------|---------------|----------|---------------|----------|
| marker      | distance | marker       | distance | marker       | distance | marker        | distance | marker       | distance | marker        | distance | marker        | distance |
| 1H_15060374 | 0.00     | 2_30929892   | 0.00     | 3_555092874  | 0.00     | 4_347921354   | 0.00     | 5HS_7374618  | 0.00     | M_45940_1182  | 0.00     | 7HL_32457559  | 0.00     |
| 1H_81153709 | 0.56     | M_97210_1356 | 0.71     | 3HL_3879907  | 0.96     | 4HL_41714463  | 0.25     | 5_54803      | 0.84     | 6HL_8783649   | 0.81     | M_242769_3871 | 0.40     |
| 1_364650787 | 1.04     | 2_26694609   | 1.20     | 4HL_43169025 | 1.50     | 4_348113084   | 0.42     | 5_3871196    | 4.49     | 1H_62545792   | 2.74     | 7_599421725   | 0.65     |
| Bmag382     | 2.54     | 2_26694616   | 1.78     | 3_558269837  | 2.16     | 4HL_11398482  | 1.38     | 5_3910746    | 5.23     | M_330613_1195 | 3.46     | 7_598787646   | 2.69     |
| 1H_72348673 | 4.03     | 2_24985605   | 2.72     | GBM1238      | 3.20     | 4_348033575   | 2.18     | 5_6509036    | 7.42     | M_330613_1188 | 4.59     | 7_596056370   | 4.01     |
| 7_344586347 | 6.49     | 2HS_16517212 | 3.24     | 3_554090773  | 4.14     | 4_516473245   | 5.50     | 5_51657943   | 8.38     | 6_534373299   | 5.22     | 7HL_15773576  | 4.23     |
| 1H_62212500 | 7.89     | 2_39596039   | 3.95     | 3_554090780  | 4.52     | M_175634_274  | 6.03     | 5_7639391    | 9.76     | 6_533822424   | 7.74     | 7_595437751   | 5.72     |
| 1H_57138137 | 11.84    | 2_29118917   | 4.47     | 3_533626144  | 5.83     | Hvm67         | 6.24     | 5HS_10560611 | 10.82    | 6_533822431   | 7.98     | 7_591558041   | 6.37     |
| 1H_45212970 | 12.23    | 2HS_37313285 | 4.95     | 3_551891621  | 6.08     | 4_540752045   | 7.01     | 5_6313908    | 11.27    | M_174987_523  | 8.23     | 7_591226833   | 6.92     |
| 1H_55833987 | 12.60    | 2HS_20878297 | 7.50     | 3_551929257  | 6.34     | 4_531321769   | 7.36     | GBM1176      | 21.03    | M_56387_3234  | 8.73     | M_799949_1714 | 7.35     |
| 1_346473338 | 13.48    | 2HS_10154317 | 8.56     | 3_550668826  | 6.63     | M_1619851_580 | 7.59     | 5_13217441   | 26.83    | 6HL_1535364   | 9.86     | 7_588435098   | 9.00     |
| 1H_57269352 | 14.35    | 2HS_4528612  | 9.49     | 3HL_33685908 | 6.91     | 4_539125355   | 7.81     | 5HS_4708010  | 27.85    | 6_527745554   | 11.60    | 7_579835513   | 10.47    |
| 1_304812961 | 17.50    | 2_47454319   | 10.19    | 3_549980712  | 8.62     | 4_531058985   | 9.77     | 5_18844526   | 29.59    | 6HL_29835879  | 13.24    | 7HL_41355425  | 10.70    |
| 1H_37679977 | 18.14    | 2_46287210   | 11.20    | 3HL_8468228  | 9.13     | 4HL_29463683  | 10.16    | 5HS_10630182 | 30.56    | 6HL_37627090  | 15.04    | 7_584904294   | 11.59    |
| 7_343729819 | 18.60    | 2_80951468   | 13.24    | Hvm70        | 10.10    | 4HL_32300191  | 11.11    | 5_19830139   | 31.03    | 6HS_27553105  | 15.40    | 7_584878350   | 11.99    |
| 1H_17392124 | 18.81    | 2HS_24897287 | 13.68    | Ebmac708     | 11.17    | 4_528451537   | 11.74    | 5HS_10630175 | 31.59    | 6_526666780   | 16.20    | 7_583744292   | 14.21    |
| 1H_33340718 | 19.38    | 2_53823341   | 14.04    | 3_546535222  | 11.53    | 4_528537626   | 12.88    | Ebmac518     | 40.93    | 6_525833390   | 16.59    | 7HL_30780105  | 14.93    |
| 1H_45582581 | 19.84    | 2_58655700   | 14.36    | 3_544159655  | 12.08    | 4HL_6141990   | 13.71    | Ebmatc40     | 41.71    | 6_525832746   | 17.21    | M_5654_1031   | 16.00    |
| 1_318483713 | 20.42    | 2HS_17887777 | 14.76    | 3HL_21691177 | 12.91    | M_49184_143   | 15.26    | M_86861_975  | 42.46    | 6_524296656   | 17.92    | M_5654_1024   | 16.82    |
| 1_306385557 | 20.63    | 2HS_24984434 | 15.28    | 3HL_6924929  | 13.97    | 4_523376166   | 16.40    | 5_46911009   | 42.96    | M_210627_4294 | 18.53    | 7HL_25087539  | 17.46    |
| 1H_52731845 | 20.86    | 2_69538796   | 18.90    | 3HL_14026067 | 14.57    | GBM1220       | 17.86    | 5HS_17167071 | 43.74    | 6_524246995   | 19.13    | 7_579149290   | 18.12    |
| 1H_85119870 | 21.46    | 2HS_33784153 | 21.57    | 3HL_32425970 | 15.98    | 4_521965050   | 18.33    | 5HS_25526871 | 44.45    | 6HL_721866    | 19.58    | 7HL_24591633  | 19.07    |

|                |       |               |       |              |       |                |       |              |       |              |       |               |       |
|----------------|-------|---------------|-------|--------------|-------|----------------|-------|--------------|-------|--------------|-------|---------------|-------|
| M_1601731_2584 | 21.76 | 2HS_32373258  | 21.75 | 3_541623241  | 17.58 | 4_519923774    | 18.64 | 5HS_21722342 | 45.34 | 6_526633800  | 19.73 | 7HL_24626778  | 19.94 |
| 1_306394013    | 22.33 | 2HS_33274533  | 21.88 | 3_541194934  | 17.67 | 3HL_43694925   | 19.75 | 5HS_2329569  | 46.13 | 6_524857877  | 20.13 | 7HL_16833964  | 20.69 |
| 1H_22440310    | 22.74 | M_227786_302  | 21.97 | 3_541192201  | 17.76 | 4_516322971    | 20.68 | 5HS_15522513 | 46.96 | 6HL_20140441 | 20.67 | M_2558454_2   | 21.06 |
| M_219981_96    | 23.17 | 2HS_6201430   | 21.97 | 3HL_42780152 | 18.89 | 4HL_46730793   | 20.81 | 5HS_20364868 | 47.18 | 6HL_6256820  | 22.50 | 7HL_2460896   | 21.46 |
| 1_306380656    | 23.63 | 2HS_1984172   | 21.97 | 3_534961137  | 19.32 | 4HL_42250692   | 20.90 | 5_92146019   | 47.81 | 6_524146158  | 23.53 | 7HL_27281835  | 25.33 |
| 1H_42625386    | 24.23 | 2_139701566   | 22.03 | 3_535856638  | 19.60 | Ebmac635       | 24.21 | 5HS_214983   | 48.83 | 6_518847442  | 24.45 | 7_575487388   | 25.64 |
| 1H_72101870    | 25.15 | M_155401_848  | 22.15 | 3HL_10565488 | 21.14 | Ebmac679       | 24.21 | 5_108529915  | 49.70 | 6_518846666  | 25.03 | 7_567206277   | 27.48 |
| 1H_48171312    | 25.80 | 2HS_1457758   | 22.62 | 7HS_22292244 | 21.97 | Ebmac788       | 24.21 | 5HL_51382606 | 50.64 | 6HL_29653636 | 25.90 | 7_570371047   | 28.13 |
| 1_273182460    | 28.23 | Ebmac640      | 24.41 | 3HL_38531260 | 22.55 | Ebmac701       | 25.19 | 5HL_39677860 | 52.05 | 6HL_29627164 | 27.07 | 7_568143905   | 29.30 |
| M_208488_950   | 28.96 | GBM1119       | 24.87 | 3HL_41243504 | 23.55 | 1H_86798188    | 26.90 | 5_215461168  | 53.18 | 6_518798568  | 28.36 | 7_565646661   | 30.44 |
| 1H_7210965     | 29.39 | 2HL_39208527  | 26.11 | 3HL_24835298 | 23.92 | M_1569102_1825 | 27.31 | 5_28519477   | 54.00 | 6_522937629  | 29.04 | 7_564913828   | 30.82 |
| M_203359_516   | 29.77 | 2HS_8991009   | 26.31 | 3_528786733  | 24.28 | 4HL_39593094   | 27.96 | 5HL_6916210  | 54.99 | Bmac40       | 31.17 | 7_565612902   | 32.36 |
| 3HL_35503007   | 30.07 | 2HS_8990224   | 26.51 | 3_528470541  | 25.88 | 4HL_45045821   | 28.96 | 5HS_24302205 | 55.89 | 6_518728726  | 32.62 | 7_565608892   | 32.90 |
| 1H_13673817    | 30.84 | 2HS_8991002   | 26.97 | 3_528413521  | 26.31 | 4HL_6409134    | 35.50 | M_235501_969 | 56.73 | 6_518708998  | 33.19 | 7_563189691   | 34.22 |
| 1H_68122776    | 31.78 | 2HS_7525108   | 27.20 | 3_529115904  | 26.68 | 4HL_37781181   | 35.95 | 5HL_40195336 | 57.31 | 6_513912312  | 39.09 | M_128403_0    | 34.62 |
| 1_283031069    | 32.04 | 2_178724239   | 27.61 | 3HL_38740410 | 27.59 | 4HL_10917270   | 36.24 | 5_133009849  | 58.01 | 6_507987808  | 40.33 | 7HL_11207206  | 35.05 |
| 1H_59728953    | 32.47 | 2HS_5233911   | 27.68 | 2HS_32409186 | 27.73 | 4_497278098    | 37.51 | Bmag387      | 59.03 | 6HL_25237074 | 41.11 | 7_563346281   | 35.36 |
| 1H_40865777    | 32.71 | 2HS_34429090  | 29.17 | 3_525094736  | 27.83 | 4_507248941    | 37.88 | Bmag751      | 59.03 | 6HL_28225622 | 41.79 | 7_563192425   | 35.54 |
| 1H_56773674    | 32.88 | 2_184213520   | 29.68 | Bmag13       | 28.48 | 4_492113206    | 38.23 | GBM1229      | 59.36 | 6_513207563  | 42.95 | 7_556060018   | 37.09 |
| 1_273831312    | 33.14 | 1H_78592035   | 29.85 | 3HL_11798617 | 29.05 | 4_491049100    | 39.20 | 5HS_16566687 | 60.34 | 7HL_38945537 | 46.29 | 5HS_22933940  | 37.68 |
| 1H_64535294    | 33.40 | 2HS_5292032   | 30.03 | 3HL_29995337 | 29.52 | 4_302992183    | 39.67 | 5HL_43554882 | 61.55 | 6_507775660  | 46.88 | AWBMS22       | 38.77 |
| 1_283031705    | 33.65 | 2HS_4425488   | 30.23 | 3_510997641  | 30.17 | 4HL_30807144   | 40.13 | 5HS_19323912 | 62.71 | 6HL_31677510 | 47.20 | 7_549668049   | 40.40 |
| 1H_40034223    | 34.08 | 2HS_28630950  | 30.79 | 3_511738805  | 30.32 | M_159676_1589  | 40.26 | 5HS_17673413 | 63.31 | 6HL_11563421 | 50.53 | 7HL_34924967  | 40.74 |
| 1H_40034863    | 34.08 | 2HS_21580884  | 31.38 | 3_510995799  | 30.45 | 4HL_7284337    | 44.29 | 5_351609227  | 64.06 | 6_503425542  | 50.98 | M_205503_1634 | 44.67 |
| 1H_67119685    | 34.18 | M_1606997_622 | 32.42 | 3HL_15958297 | 30.94 | 7HL_30194632   | 44.97 | 5HS_10311601 | 64.44 | 6_503925621  | 51.76 | 7_540653807   | 45.10 |

|              |       |              |       |              |       |              |       |               |       |                |       |               |       |
|--------------|-------|--------------|-------|--------------|-------|--------------|-------|---------------|-------|----------------|-------|---------------|-------|
| 1_262809320  | 35.62 | 2HS_1353446  | 33.52 | 3HL_13955756 | 31.10 | 4_478170355  | 45.54 | 5HL_47892947  | 64.60 | 6_504356044    | 52.09 | 7_542100185   | 46.00 |
| 7HL_42113522 | 36.19 | 2HS_10844482 | 34.37 | 3HL_6983780  | 31.10 | 4HL_7413924  | 46.06 | M_153633_1451 | 64.68 | 6HL_7541370    | 53.02 | 7_540657058   | 46.69 |
| 1_187469868  | 36.44 | 2HS_12173461 | 35.08 | 2HL_33741786 | 31.27 | 4_484110367  | 46.63 | 5HL_45327316  | 65.12 | 6HL_13208482   | 53.93 | 7_542104217   | 47.10 |
| 1H_24961778  | 36.65 | 2_152841129  | 35.83 | 3HL_15958290 | 31.63 | 4_476069545  | 47.51 | 5_84104995    | 65.88 | 6HL_2868718    | 54.05 | GBM1102       | 49.24 |
| 1H_58042355  | 37.27 | 2HS_6117794  | 36.57 | 3HL_32354397 | 32.37 | 4HL_34336217 | 47.80 | 5HL_49177504  | 66.77 | M_10881_1032   | 54.68 | 7_516026682   | 50.66 |
| 1H_82851228  | 38.05 | 7HL_9860070  | 37.64 | 3_504148850  | 32.64 | 4_478121188  | 48.17 | 5_251934708   | 67.24 | 6HL_33075117   | 55.32 | 7_536158078   | 51.58 |
| M_192877_732 | 38.71 | 2_152855299  | 38.08 | 3_511749149  | 32.72 | 4HL_22081371 | 49.28 | M_115973_1160 | 68.22 | 6HL_8182034    | 55.99 | 7_539340050   | 52.68 |
| 1H_10744858  | 39.50 | 2_105762766  | 38.59 | 3_504106156  | 35.91 | 4_476823217  | 49.57 | M_236918_510  | 69.40 | 6HL_39725136   | 56.24 | M_216504_505  | 52.92 |
| 1_258171231  | 40.35 | 2HS_29109012 | 38.66 | 3HL_628887   | 36.39 | 4_471397484  | 50.34 | 5HL_11830955  | 70.06 | 6HL_35490340   | 56.72 | 7HL_6657809   | 53.15 |
| 1_300594305  | 41.12 | 2_296072899  | 39.10 | 3HL_44939929 | 36.95 | 4HL_8179430  | 50.99 | 5HS_214990    | 70.58 | 6_495768585    | 57.50 | M_159744_1945 | 55.14 |
| 1H_10863328  | 41.92 | 2_133001522  | 39.49 | 3HL_43480963 | 37.50 | 4HL_31815104 | 51.30 | 5HS_2044925   | 71.19 | 6_497251142    | 59.40 | 7_598211495   | 55.38 |
| 1_268449262  | 42.23 | 2_230402376  | 40.00 | 5HL_48131831 | 37.89 | 4HL_39762817 | 51.42 | 5HS_12395032  | 71.50 | M_305199_555   | 61.27 | 7_529554189   | 55.53 |
| Bmac90       | 42.91 | 2HS_29552137 | 40.16 | 3HL_22406140 | 38.13 | 4_471693054  | 51.53 | 5_66389622    | 71.86 | M_216745_309   | 61.79 | 7_552887354   | 55.95 |
| Ebmac501     | 42.91 | M_189451_366 | 40.30 | 3HL_11772588 | 38.49 | 4HL_8179437  | 51.74 | 5HS_13258294  | 72.46 | 6_484793339    | 62.05 | 1_4088556     | 56.59 |
| 1_207529875  | 43.50 | 2_110610069  | 40.87 | 6HL_29119759 | 38.61 | 4_474989327  | 52.24 | 5_134943899   | 73.18 | M_87464_742    | 62.21 | 7_523855164   | 57.49 |
| 1H_59488380  | 43.64 | 2_109580152  | 41.65 | 3_499436820  | 41.41 | 4_465511838  | 54.51 | 5HS_15616455  | 73.80 | M_65217_848    | 62.62 | 7_524132075   | 57.85 |
| 1_208846772  | 44.49 | 2HS_16257459 | 42.42 | 3HL_7173767  | 41.90 | 4_240485464  | 54.90 | 5HS_14996024  | 74.29 | 6HL_22068577   | 63.31 | 7HL_29591288  | 57.96 |
| 1H_72511444  | 45.05 | 2_215081469  | 42.87 | 3HL_12267275 | 44.10 | 4_453639479  | 55.40 | 5_168012062   | 75.20 | M_1595340_1528 | 63.85 | 1_4089724     | 58.01 |
| 1_174217948  | 45.26 | 2HS_26743035 | 44.09 | 3HL_12268950 | 44.10 | 4_436742913  | 56.22 | 5_147872945   | 75.77 | 6HL_39566717   | 64.39 | M_141415_212  | 58.05 |
| M_214196_822 | 45.83 | Bmag813      | 45.45 | 3HL_40362485 | 45.10 | M_292667_419 | 56.91 | M_165866_1487 | 76.15 | 6HL_36831590   | 65.53 | M_234920_296  | 58.09 |
| 1H_82586715  | 46.37 | Bmag518      | 46.63 | 3_489536928  | 45.39 | 4HL_38170681 | 57.07 | 5HL_43862216  | 77.74 | 6HL_36155644   | 66.49 | 7HL_20380929  | 58.14 |
| 1H_69139092  | 46.72 | Bmac93       | 46.81 | 3HL_1279964  | 46.11 | 4_261703040  | 57.23 | 5HL_18867551  | 78.52 | M_1581573_816  | 67.40 | M_73771_1811  | 58.25 |
| 1H_22955049  | 47.46 | 2_147380064  | 48.41 | M_97612_856  | 46.22 | 4HL_23617323 | 58.02 | M_1849165_384 | 78.89 | 6HL_24721940   | 68.26 | 7HL_33935949  | 58.74 |
| 1_167351152  | 47.87 | 2_285259057  | 49.79 | 3_486640344  | 46.69 | 4HL_16624993 | 58.36 | 5_167950701   | 79.36 | M_133598_225   | 68.82 | 7_528531136   | 60.07 |
| 1H_51202448  | 48.23 | 2HL_30717778 | 50.56 | 3_486632809  | 46.87 | 4_434123085  | 58.82 | M_282476_1183 | 79.77 | M_67547_965    | 69.10 | M_1622733_603 | 60.31 |

|               |       |               |       |              |       |                |       |               |        |               |       |               |       |
|---------------|-------|---------------|-------|--------------|-------|----------------|-------|---------------|--------|---------------|-------|---------------|-------|
| 1H_81216340   | 48.71 | M_128359_1045 | 51.11 | M_158884_25  | 47.47 | 4HL_5092076    | 59.54 | 6_423872859   | 80.45  | 6HL_29033848  | 69.53 | 7_519325233   | 61.05 |
| 1_188266189   | 49.07 | 2HS_35845316  | 51.94 | 3_484679524  | 47.70 | 4_430947935    | 60.56 | 5_158847739   | 81.56  | 6_480444698   | 70.85 | 7HL_41147678  | 63.98 |
| 1H_65762157   | 49.58 | M_80184_1375  | 52.51 | 3HL_33828484 | 48.00 | Bmag490        | 62.34 | 5HS_21385587  | 82.97  | 3HL_30556025  | 72.24 | 7_521973920   | 64.59 |
| 1_97709789    | 50.11 | 2HL_17013042  | 52.61 | 3HL_33363575 | 48.29 | Bmac186        | 62.70 | 5_208212394   | 84.28  | 6_480485322   | 73.72 | 7HL_28107982  | 64.77 |
| 1_113838203   | 50.36 | 2HS_5593596   | 53.96 | 3_482018807  | 48.92 | 4_431398963    | 64.43 | 5_142876283   | 85.23  | 6_480356150   | 74.15 | 7HL_8312277   | 64.95 |
| 1H_68973217   | 50.86 | 2HL_14077718  | 55.39 | 3HL_17280395 | 49.90 | M_1596497_1560 | 65.03 | 5_208239424   | 86.18  | 6_472829987   | 74.82 | 7HL_13143105  | 65.18 |
| 1_113838210   | 51.84 | 2HL_33276866  | 55.78 | 3HL_28498322 | 50.43 | 4_429615338    | 65.64 | M_193887_1076 | 87.06  | M_227287_599  | 75.21 | 7HL_37199773  | 65.75 |
| 1H_73559241   | 52.89 | 2_362750355   | 55.97 | 3HL_15852231 | 51.48 | 4HL_44314448   | 66.16 | 5HL_23411605  | 89.25  | 6_473076290   | 75.72 | 7HL_4313756   | 66.21 |
| 1H_58188215   | 53.86 | 2_146189440   | 56.20 | 3HL_33151823 | 51.74 | M_1606706_765  | 66.63 | 5HS_10059836  | 90.76  | 2HL_24372145  | 76.07 | 7_501748124   | 66.67 |
| 1_113807278   | 54.36 | M_308169_552  | 56.48 | 3HL_45910009 | 52.07 | 4HL_17692246   | 67.08 | 5HS_21724907  | 92.33  | 6HL_40780311  | 76.24 | 7HL_39503073  | 67.00 |
| 1H_22104337   | 55.45 | M_132750_2128 | 56.83 | 3HL_15374972 | 52.55 | 4HL_4256734    | 67.26 | 5HL_45333334  | 93.03  | 6HL_26706644  | 76.61 | M_125216_531  | 67.43 |
| 1_191974362   | 55.83 | 2HL_38135646  | 57.28 | 3HL_48064911 | 55.41 | 4_411663608    | 67.26 | 5HS_16248377  | 93.59  | GBM1256       | 78.13 | M_96819_188   | 67.93 |
| HvM20         | 56.33 | 2HL_28612471  | 57.35 | 3_474974240  | 56.31 | 4_423550415    | 67.41 | 5HL_17848298  | 94.14  | 6HL_6355520   | 79.52 | 7HS_35867270  | 68.31 |
| 1H_67428199   | 56.61 | 2HL_40313424  | 57.71 | 3HL_34537138 | 56.99 | 4_430951797    | 67.76 | 4HL_44023327  | 95.11  | 6_480507072   | 79.95 | 7HL_29967547  | 68.44 |
| 1H_59227174   | 56.92 | 2_287559067   | 57.92 | 3HL_24669457 | 57.64 | M_325150_1504  | 68.29 | 5HS_11608473  | 95.89  | 6_468938258   | 80.46 | 7HL_3360534   | 69.18 |
| 1_154836162   | 57.28 | M_193322_318  | 58.11 | 3_471571393  | 57.87 | 4HL_15111896   | 69.35 | 5HS_24357909  | 96.80  | M_145223_1780 | 80.57 | M_363857_407  | 70.04 |
| 1H_60459469   | 57.51 | 2HS_30524211  | 58.62 | 3HL_2943510  | 58.13 | M_300241_491   | 70.47 | 5HL_12670406  | 97.74  | 4_79532838    | 80.89 | 7HL_37641944  | 70.43 |
| 1H_6665309    | 57.82 | 2HS_17957603  | 59.05 | Bmag225      | 59.17 | 2_508501818    | 71.23 | 5_177678359   | 98.73  | M_1625128_432 | 81.77 | 7HL_27160293  | 70.75 |
| 1H_66531625   | 58.47 | 2HS_14472585  | 59.15 | 3_449366069  | 65.26 | 4_379247469    | 71.62 | M_290866_2476 | 99.61  | 6HL_29286452  | 82.72 | 7_499286221   | 70.75 |
| 1_215934943   | 59.57 | 2HS_31394907  | 59.20 | M_60564_192  | 65.59 | 4HL_20849278   | 71.62 | M_212822_493  | 100.28 | 6HL_27550031  | 83.35 | 7HL_18681541  | 71.09 |
| 1_141406485   | 60.40 | 2_222165120   | 59.20 | 3_452489880  | 65.59 | 4_383437046    | 71.74 | 5HL_22043160  | 101.67 | 2HL_44342203  | 83.95 | M_149272_1266 | 71.65 |
| M_113599_2631 | 61.40 | 2_106064968   | 59.28 | 3HL_29437708 | 66.06 | Bmac30         | 72.19 | 5HS_16446198  | 102.19 | 2HS_26945700  | 84.71 | 7HL_15512843  | 71.89 |
| 1H_19218707   | 62.84 | 2_120687829   | 59.44 | 3_453794177  | 66.48 | 4_407308714    | 72.96 | M_191556_3625 | 102.54 | 6_451975519   | 85.17 | 7_500618431   | 72.18 |
| M_2579923_225 | 64.13 | 2HS_6277837   | 59.61 | 3_444827923  | 66.58 | 4HL_46272554   | 73.13 | 5HL_44466712  | 103.19 | M_93290_2008  | 85.56 | 7_486000975   | 72.51 |
| 1H_31926957   | 64.81 | 2HL_37394745  | 60.00 | 3_449368974  | 67.01 | 5HL_40573685   | 73.80 | 5HS_15859296  | 103.54 | 6HL_26059439  | 85.91 | 7_486001569   | 72.71 |

|               |       |                |       |               |       |               |       |               |        |                |        |              |       |
|---------------|-------|----------------|-------|---------------|-------|---------------|-------|---------------|--------|----------------|--------|--------------|-------|
| 1_147573318   | 64.95 | 2HS_14637826   | 60.43 | 3_449419945   | 67.95 | 4HL_33997002  | 74.39 | 5HL_17760388  | 103.79 | 6_442589206    | 86.03  | 7HL_38039117 | 73.01 |
| 1_160044163   | 65.71 | M_2564099_1111 | 60.89 | 3_445732233   | 69.05 | M_228899_805  | 74.86 | M_109322_807  | 103.96 | 6_403040676    | 91.02  | 7HL_31396537 | 73.56 |
| M_126455_423  | 66.11 | 2HS_35831478   | 61.70 | 3_441949992   | 69.34 | 4HL_15475917  | 75.52 | 5HL_27068238  | 104.21 | 6_413199603    | 91.43  | 7_489795725  | 73.63 |
| 1H_82612441   | 66.19 | 2HL_30880394   | 63.04 | 7HS_39715161  | 69.68 | M_92618_566   | 76.59 | 5HS_27679695  | 104.49 | 6_415295571    | 91.61  | 7HL_25508816 | 74.02 |
| 1H_51201201   | 66.32 | 2HL_24337207   | 63.86 | 3HL_15283896  | 70.16 | 4HL_44079621  | 77.47 | 5HL_46081168  | 104.86 | 6HL_13457511   | 91.69  | 7_485717629  | 74.60 |
| M_150966_1178 | 66.93 | 2HL_49027260   | 64.59 | M_125452_800  | 70.93 | 4HL_5909211   | 77.59 | 5_200109411   | 105.36 | 6_372848417    | 92.18  | M_85228_1401 | 75.00 |
| 1H_45321672   | 67.81 | 2HL_43960788   | 65.65 | 3_434559804   | 71.40 | M_330520_709  | 78.06 | M_121292_767  | 105.97 | 6_408183396    | 92.52  | 7_489783222  | 75.30 |
| M_2563471_507 | 68.41 | 2_451183747    | 66.51 | 3_434559075   | 71.89 | M_250247_835  | 78.82 | 5HS_12487361  | 107.18 | 6_411874656    | 93.20  | 7_486834197  | 75.52 |
| 1H_44785701   | 69.03 | 2_410688104    | 67.26 | M_125452_3570 | 72.55 | M_147172_2403 | 79.25 | 5HL_28625859  | 107.71 | M_367945_543   | 94.16  | 7HS_40239648 | 75.67 |
| 1H_59785057   | 69.28 | 1H_24966320    | 67.67 | Gms116        | 74.04 | 6HS_34955464  | 79.72 | 5HL_51066705  | 108.57 | 6HL_32472005   | 94.86  | 7HL_18904683 | 75.75 |
| 1H_63807750   | 69.69 | 2_438686337    | 67.76 | M_148546_924  | 75.68 | M_126980_1619 | 79.91 | 5HL_32846580  | 109.00 | M_200155_412   | 95.84  | 7_500661278  | 76.14 |
| 1_121770457   | 70.09 | 2_406934594    | 68.18 | M_2549593_140 | 75.83 | 1H_70968226   | 81.34 | 5HL_20217360  | 109.29 | 6HL_14568415   | 96.56  | 7HL_6800849  | 76.63 |
| 1H_75517167   | 70.57 | M_1999039_479  | 68.47 | 3_434451394   | 76.42 | 4HL_4337750   | 82.33 | 5_182351049   | 109.50 | 6HL_26939216   | 97.90  | 7HL_27748871 | 77.31 |
| 1H_40713213   | 71.32 | 2HL_2742232    | 68.75 | 3HL_41024310  | 76.78 | 4HL_4336601   | 83.39 | 5HL_43093388  | 109.71 | 6HL_1116639    | 98.95  | 7HL_26774972 | 77.97 |
| 1H_13695822   | 71.57 | 2_426554428    | 69.02 | 3HL_49369809  | 77.80 | 4_268295136   | 85.01 | 5HS_16459563  | 109.93 | M_2548146_2058 | 99.26  | 7HL_18740873 | 78.07 |
| 1_243751360   | 72.33 | 2HL_18957514   | 69.66 | 3HL_47371940  | 78.23 | 4HL_31348524  | 86.64 | M_156886_459  | 110.22 | 6HL_25017621   | 99.48  | 5HS_28800141 | 78.63 |
| M_214168_632  | 72.59 | 2HL_20952058   | 70.60 | M_78479_1593  | 78.40 | 4HL_37729220  | 86.91 | 5HS_15933224  | 110.69 | 6_485528864    | 99.66  | GMS46        | 79.71 |
| 1_201848085   | 73.59 | 2HL_26347197   | 71.44 | 3HL_21306461  | 78.69 | 4HL_28043578  | 87.34 | 5HS_24463022  | 111.20 | 1H_87925591    | 99.86  | 7_494149861  | 80.79 |
| 1H_61681644   | 74.55 | 1H_84464771    | 71.93 | 3HL_21303890  | 79.19 | 4_311821861   | 87.55 | 5_146466415   | 112.07 | 6HL_24546503   | 100.31 | 7HL_24505608 | 81.26 |
| 1H_46122499   | 75.05 | 2HL_19588550   | 72.11 | 3HL_39880616  | 79.73 | 4HL_40097704  | 87.70 | 5HS_19782223  | 112.77 | 6_429287001    | 100.83 | 7_481164032  | 82.20 |
| 1_129743777   | 75.25 | 2_439032332    | 72.28 | 3_440999767   | 80.40 | M_146649_4    | 87.99 | 5HS_9589875   | 113.52 | M_1661027_233  | 102.03 | M_297541_686 | 82.60 |
| 1H_274731     | 75.94 | 2HL_44835824   | 72.64 | 3HL_37773053  | 80.61 | 4HL_28208411  | 88.76 | M_116376_1416 | 114.55 | 6HL_39991404   | 102.75 | 7HL_39485022 | 82.68 |
| 1H_74505403   | 77.76 | 2HL_10858514   | 73.14 | 3_426808044   | 81.08 | 6HL_39131112  | 89.65 | M_121125_1375 | 115.07 | 6HL_31282585   | 102.99 | 7_470854903  | 82.86 |
| M_85194_2247  | 78.25 | M_223185_321   | 73.63 | 3HL_8500939   | 81.43 | 4HL_42790942  | 90.08 | 5HL_46910494  | 115.93 | M_2086269_498  | 103.17 | 7HL_33306869 | 83.18 |
| 1H_61373505   | 78.40 | 2HL_31367082   | 73.85 | 3_411835196   | 82.05 | 4_282929353   | 90.42 | M_182396_1923 | 116.38 | 6HL_34025772   | 103.31 | 7HL_26774979 | 83.40 |

|               |       |               |       |              |       |               |        |               |        |               |        |              |       |
|---------------|-------|---------------|-------|--------------|-------|---------------|--------|---------------|--------|---------------|--------|--------------|-------|
| 1_186628692   | 78.68 | 2_255716516   | 74.05 | 3HL_3720522  | 82.99 | M_74213_950   | 91.06  | 5_90206977    | 117.32 | 6HL_14584491  | 103.43 | M_229649_670 | 83.93 |
| 1H_279094     | 79.00 | 2HL_38047576  | 74.17 | 3HL_13945592 | 83.29 | 4_203374245   | 91.52  | 7_158082443   | 118.30 | 6HL_13079821  | 103.51 | M_1586526_5  | 84.02 |
| 1_239463847   | 79.27 | 2HL_47888627  | 74.33 | 3HL_45339617 | 83.51 | 4HL_38836656  | 92.85  | 5HS_16277353  | 119.66 | 6_382186017   | 103.51 | 7_467497351  | 84.10 |
| 1H_74505195   | 79.53 | 2_370819614   | 74.64 | 3HL_27247338 | 83.60 | M_146266_881  | 94.15  | 5_237332705   | 121.17 | 6_466619694   | 103.57 | 7HL_19193116 | 84.35 |
| 1H_60650513   | 79.78 | 2HL_25534662  | 74.74 | 3HL_11561307 | 83.60 | 4HL_13162022  | 94.53  | M_120163_805  | 122.08 | 6HL_36077879  | 103.71 | 6HL_40682614 | 84.69 |
| M_131428_1439 | 80.03 | M_207663_343  | 75.39 | 3_403275941  | 83.78 | 4_366310571   | 94.61  | 5HS_4157152   | 123.53 | 6HL_13081358  | 104.14 | 7HL_6538740  | 85.09 |
| 1H_21840444   | 80.60 | 2HL_28152271  | 76.29 | 3HL_26328866 | 84.34 | 4HL_42047336  | 95.00  | M_213355_436  | 124.63 | 6HL_13081351  | 104.69 | 7_471932456  | 85.47 |
| 1H_54309325   | 80.68 | 2HL_18855931  | 77.46 | 3HL_16401098 | 85.12 | 4HL_4616362   | 95.68  | 5_95944672    | 125.36 | 6HL_35014660  | 105.19 | M_69439_721  | 85.89 |
| 1H_70258462   | 81.26 | M_223185_603  | 78.98 | 3HL_6379690  | 85.54 | 4_312324981   | 96.26  | 5HL_29788070  | 126.05 | 6HL_35014667  | 105.98 | 7HL_30474140 | 86.47 |
| 1H_3132281    | 81.76 | M_167678_1523 | 79.80 | 3HL_25561608 | 85.54 | 4_260177243   | 96.79  | 3HS_810381    | 126.65 | 6HL_11679052  | 107.11 | 7_469557232  | 87.11 |
| 1H_13600752   | 82.23 | M_256210_824  | 80.87 | 3HL_31657066 | 85.54 | 4HL_34427461  | 97.25  | 5HS_5497569   | 127.40 | 6HL_4483655   | 108.62 | 7HL_37824340 | 87.76 |
| M_164333_1071 | 82.81 | 2_310280015   | 81.97 | 3_396805813  | 85.85 | 4_263403559   | 97.78  | 3_504149172   | 128.06 | 6_405096283   | 109.34 | 7_460649517  | 88.19 |
| 1H_65837753   | 83.68 | 2_341491653   | 81.97 | 3_490323212  | 85.85 | 4HL_11548111  | 98.64  | M_1821326_708 | 128.72 | 6_385523543   | 109.52 | 7HL_7354399  | 89.32 |
| 1H_14055800   | 84.70 | 2_386639838   | 82.39 | 3_386621954  | 85.85 | 4HL_22242513  | 99.18  | M_167216_153  | 129.47 | 6_369199540   | 111.17 | 7HL_28006539 | 89.92 |
| 1H_63161731   | 85.83 | M_217052_340  | 83.23 | 3HL_39017952 | 85.95 | 7HL_32686430  | 99.76  | 5_243757730   | 130.24 | 6HL_31455714  | 111.74 | 7_446906010  | 90.37 |
| 1H_51696294   | 86.27 | 2_596664618   | 83.99 | 3_389354753  | 86.57 | 4HL_44654768  | 100.36 | M_119826_513  | 130.62 | 6HL_27000128  | 112.04 | 7HL_24888341 | 90.83 |
| 1H_65535529   | 86.43 | 2HL_25536047  | 84.50 | 6HL_25349295 | 87.77 | M_167686_4294 | 101.74 | 5HL_38619521  | 130.82 | 6HL_7718387   | 112.38 | 7HL_29401655 | 91.38 |
| M_225757_1026 | 86.58 | 2HL_44664414  | 84.94 | 3HL_19389223 | 87.99 | 4HS_24316190  | 103.04 | M_302404_257  | 131.34 | 6HL_16162419  | 113.00 | 7_428184911  | 92.10 |
| Bmag211       | 86.70 | 2HL_44788406  | 85.21 | 3HL_45333061 | 88.68 | 4HS_19600191  | 103.91 | 5HS_14987153  | 132.20 | M_437770_1111 | 113.69 | 7HL_27996637 | 92.62 |
| 1_69741663    | 86.80 | M_207663_1931 | 85.93 | 3HL_13755803 | 89.26 | 4HS_39712945  | 104.33 | 5HL_6073490   | 133.03 | 6_392210201   | 114.63 | 7HL_39750192 | 92.90 |
| 1H_46868529   | 86.90 | 2_394340366   | 86.58 | 3HL_5216529  | 89.60 | M_2551499_864 | 104.80 | M_282638_2707 | 133.62 | 6_419633203   | 115.37 | 7HL_10412411 | 93.12 |
| 1H_2112459    | 87.02 | GBM1218       | 87.51 | 3HL_14205585 | 89.96 | M_72645_4588  | 105.24 | 5HL_33592928  | 134.19 | 6HL_21906841  | 115.67 | 7_446872355  | 93.38 |
| M_1607548_59  | 87.12 | GMS3          | 87.51 | 3_217506992  | 90.33 | 4HL_4823802   | 105.40 | 1H_66366382   | 134.64 | 6HL_5968146   | 116.48 | Bmag746      | 93.97 |
| 1H_59768568   | 87.12 | Bmag829       | 88.11 | 3_374239627  | 90.67 | 4HL_46501110  | 105.50 | M_321019_192  | 135.66 | 6_369141566   | 117.09 | 7_318484923  | 94.70 |
| 1H_81710076   | 87.12 | 2HL_39558214  | 89.61 | 3_362874381  | 90.83 | 4HL_2479367   | 105.58 | 5HL_39150214  | 136.66 | 6_371118902   | 117.45 | 7HL_17732243 | 95.33 |

|               |        |                |        |                |        |               |        |                 |        |              |        |               |        |
|---------------|--------|----------------|--------|----------------|--------|---------------|--------|-----------------|--------|--------------|--------|---------------|--------|
| 1H_71315495   | 87.12  | 2HL_23335246   | 90.23  | 3_267212934    | 91.07  | 4HL_45735779  | 105.68 | 5HL_49399870    | 138.06 | 6HL_24599024 | 117.69 | M_104241_836  | 95.79  |
| 1H_51860442   | 87.19  | 5HL_30259839   | 91.43  | 3_352516259    | 91.48  | 4HL_29929524  | 105.81 | 4HS_28052540    | 138.78 | 6_354112389  | 119.62 | 4HL_39191572  | 95.89  |
| 1_192265578   | 87.57  | 2HL_23593797   | 92.04  | M_1580553_1035 | 92.23  | M_304997_83   | 105.99 | 1H_81979810     | 139.72 | 6HL_28778393 | 119.97 | M_100388_582  | 96.15  |
| Bmag770       | 88.97  | 2HL_26409007   | 92.84  | 3HL_42463820   | 92.91  | 4_198146445   | 106.22 | M_69912_1020    | 140.35 | 6HL_25692192 | 121.95 | 7HL_22170668  | 96.33  |
| 1_79061502    | 89.94  | M_1606689_1135 | 93.24  | 3HL_4465853    | 93.38  | 4_200841878   | 106.73 | 5HL_43331862    | 140.81 | 6HL_36082630 | 122.55 | 7HL_41894552  | 96.45  |
| 1H_3416230    | 90.55  | 2HL_24094592   | 93.37  | 3_369845685    | 93.57  | 4HS_11808880  | 107.48 | M_1634918_588   | 141.07 | 6_295566586  | 123.12 | 7_424838106   | 96.51  |
| 1_86437113    | 91.15  | 2HL_42741686   | 93.37  | 3HL_6015573    | 93.76  | 3HS_22987940  | 107.69 | 5_211041692     | 141.48 | 6HS_905513   | 123.96 | 7_440111505   | 96.92  |
| 1H_63110764   | 92.07  | M_294977_1390  | 93.42  | 3HL_15822689   | 93.94  | 4HL_34930707  | 108.06 | M_65287_3266    | 142.03 | 6HS_14436965 | 124.10 | 7HL_39790713  | 97.39  |
| 1_414284041   | 93.06  | 2HL_2741060    | 93.71  | 3HL_2694409    | 94.11  | 4HL_45649291  | 108.71 | 5HL_36921809    | 142.81 | 6HL_23850671 | 124.82 | 1H_54211777   | 97.85  |
| 1_70081144    | 94.44  | M_230635_804   | 94.41  | 3HL_19606269   | 94.36  | M_140524_2639 | 109.34 | 5HL_3649575     | 143.56 | 6HL_30097652 | 125.47 | 7HL_39790706  | 97.98  |
| 1_69995154    | 95.23  | M_54203_5996   | 95.12  | 3HL_32665027   | 94.60  | 4HL_35946015  | 109.71 | 5HL_35363259    | 144.08 | 6HS_11428410 | 125.73 | 7_431414178   | 98.14  |
| M_248244_1456 | 95.86  | 2HL_27432067   | 95.84  | 1_446245465    | 94.81  | M_180821_933  | 110.45 | 5HL_29047107    | 144.48 | 6_360051240  | 125.86 | 7HL_33672358  | 98.60  |
| 1H_76945612   | 96.25  | 2HL_43859802   | 96.02  | 3_381989792    | 95.36  | Ebmac906      | 110.77 | M_70688_2113    | 145.30 | 6_254867927  | 126.37 | 7_431349278   | 99.20  |
| 1H_63044931   | 97.09  | 2_447773331    | 96.41  | 3_379024546    | 95.79  | 4_166903149   | 110.89 | M_322077_429496 | 145.85 | 6HL_26708031 | 127.04 | 7_256493146   | 100.89 |
| 1H_47641355   | 97.71  | 2HL_37542979   | 97.81  | 3HL_7660023    | 96.39  | 3HS_12473800  | 111.01 | M_146187_940    | 146.68 | 6HL_1993657  | 127.58 | M_168364_499  | 101.44 |
| 1_74125493    | 98.42  | 2_521014801    | 99.14  | 3HL_16015449   | 97.53  | 4HS_39092168  | 111.27 | M_1634918_581   | 147.41 | 6_307582762  | 128.07 | 7HS_42314946  | 101.77 |
| 1_71832171    | 98.69  | M_173221_716   | 99.95  | 3_219109045    | 98.35  | 4_231149779   | 111.94 | M_302796_98     | 149.08 | 6HL_23405967 | 128.71 | 7HL_11953678  | 102.47 |
| 1H_50989596   | 99.02  | 2HL_16566180   | 100.34 | 3_428733082    | 98.60  | 4HS_27244737  | 112.65 | 5_301063594     | 149.84 | 6HS_18700041 | 129.66 | 7_276974619   | 103.23 |
| 1_64786750    | 99.41  | 2HL_23870380   | 101.25 | 3_371192089    | 98.72  | 4HS_22306623  | 112.83 | 5_309377165     | 150.60 | 6HL_20672652 | 130.65 | 7HS_9727363   | 103.35 |
| Bmag718       | 99.78  | 2HL_134136     | 101.79 | M_227450_667   | 98.86  | 4_163898518   | 113.23 | 5_333691837     | 151.43 | 6HL_20105418 | 131.15 | 7HS_38161179  | 103.92 |
| 1H_71490536   | 100.21 | 2HL_18527860   | 103.41 | 3_219205628    | 99.78  | 4HS_35038521  | 113.68 | 5HL_10821972    | 152.62 | 6_136865314  | 131.34 | M_172321_1859 | 104.33 |
| 1H_48137486   | 100.84 | 2_473837037    | 104.36 | 3HL_43341146   | 100.55 | 4_85978384    | 114.76 | 5HL_36003694    | 153.69 | 6HS_15595303 | 132.50 | 7HL_32111786  | 104.45 |
| 1H_36913991   | 101.72 | 6_149903294    | 107.32 | 3HL_19802894   | 101.46 | 4_172632686   | 115.02 | 5HL_42421219    | 154.22 | 1_461094537  | 133.29 | M_89435_978   | 104.79 |
| 1_63836089    | 102.40 | 2_479999250    | 108.04 | M_128042_720   | 102.11 | M_242005_79   | 115.43 | 5HL_13495684    | 154.62 | M_413056_642 | 133.67 | M_298899_323  | 105.44 |
| 1H_52636104   | 104.06 | 2HL_42857061   | 108.69 | 3HL_13120701   | 102.83 | 4HS_28702663  | 115.65 | M_81421_1318    | 155.35 | 6HS_10840212 | 133.81 | 7HS_15895352  | 106.07 |



|               |        |              |        |                |        |               |        |                |        |               |        |              |        |
|---------------|--------|--------------|--------|----------------|--------|---------------|--------|----------------|--------|---------------|--------|--------------|--------|
| 1H_11727006   | 104.85 | 2_386606309  | 109.17 | M_115827_1345  | 103.31 | 4HL_29931449  | 116.03 | 5HL_19633581   | 156.16 | 6_167517556   | 133.92 | 7_266425095  | 106.69 |
| 1H_28288036   | 105.67 | 2HL_32765002 | 109.57 | 3_181578804    | 103.68 | 4HS_4815132   | 116.23 | 5_306133226    | 156.86 | 6_119236872   | 134.03 | 1H_82374297  | 107.52 |
| 1_88134541    | 107.02 | 2_411931129  | 109.97 | 3HS_24352223   | 104.01 | 4HS_19718929  | 116.78 | M_198558_704   | 157.68 | 6HS_4428068   | 134.35 | 7HS_31863896 | 108.08 |
| 1H_46993132   | 107.58 | 2_481879811  | 111.39 | 3HL_30928831   | 104.33 | 4HS_37856342  | 117.64 | 4HL_36557878   | 158.37 | 6HS_21293212  | 134.73 | 7HS_25452946 | 108.49 |
| 1H_35430201   | 108.03 | 2_488526484  | 111.54 | 3HL_5729862    | 104.73 | 4_235768001   | 118.08 | 5_333690029    | 158.67 | 6_167519527   | 135.26 | 7HS_35580690 | 109.26 |
| 1_126870806   | 108.40 | M_118538_318 | 111.66 | M_328622_766   | 105.26 | M_75617_4898  | 118.55 | 5HL_18262105   | 159.33 | 6_119237390   | 135.85 | M_310867_507 | 110.15 |
| 1H_68770353   | 108.67 | 2_481833725  | 112.17 | M_1604359_2677 | 105.33 | M_1586023_526 | 119.28 | 6_430872418    | 159.87 | 6_100251183   | 137.40 | 7HL_36999769 | 110.49 |
| 1H_52481961   | 109.24 | 2_485077422  | 112.68 | 3HS_1235507    | 105.94 | 7HL_15514967  | 120.18 | 5HL_32148262   | 160.09 | M_1588185_708 | 137.61 | 7_270366894  | 110.82 |
| 1H_21410475   | 109.43 | 2HL_10917142 | 113.05 | 3_115656395    | 106.38 | 4HS_32466333  | 121.56 | 5HL_22883152   | 160.38 | 6HS_29527846  | 138.12 | 7HS_26745260 | 111.40 |
| 1H_21409814   | 109.80 | 2HL_16222169 | 114.15 | M_131037_1732  | 106.59 | 4_185392211   | 123.54 | 5HL_4248479    | 160.92 | 6HS_1861379   | 139.59 | 7HS_26362969 | 111.97 |
| M_299738_727  | 110.37 | 2HL_13832944 | 115.84 | 3HS_36393149   | 107.17 | M_168917_926  | 124.99 | M_1645985_1227 | 161.72 | 6HS_21863145  | 140.83 | M_171247_237 | 112.57 |
| 1H_32618947   | 112.03 | 2_480244865  | 116.28 | 3_199957740    | 107.83 | 4HS_21093462  | 125.25 | Bmac303        | 162.76 | 6HS_19809554  | 141.83 | 7HL_36983527 | 113.20 |
| 1H_34522869   | 113.88 | 2_519929645  | 116.83 | 3HL_18997117   | 108.69 | 4HL_47348553  | 126.12 | Bmag323        | 162.76 | M_429316_458  | 142.24 | 7_286729861  | 114.09 |
| 1H_34524346   | 114.50 | 2HL_13831365 | 117.41 | 3HS_1851613    | 109.29 | 4HS_21348659  | 126.93 | M_96665_103    | 163.63 | M_75484_481   | 142.72 | 7HL_31175469 | 115.22 |
| 1_58149966    | 115.68 | 2_456666117  | 118.78 | 3_117826936    | 109.91 | 4_121425641   | 127.16 | 5HL_49625566   | 164.84 | 6_122597999   | 143.01 | 5_496886371  | 115.85 |
| M_192224_1318 | 116.36 | 2_497016140  | 119.06 | Bmag138        | 110.51 | M_142742_467  | 127.35 | 5HL_33488756   | 165.56 | 6HS_23800167  | 143.11 | M_254133_378 | 116.44 |
| 1_41186142    | 117.01 | 2_506545106  | 120.49 | Bmac129        | 111.35 | M_56490_2564  | 127.54 | 5HL_42668326   | 166.28 | 6_153928349   | 143.66 | 7_302813681  | 117.06 |
| 1_41342487    | 117.43 | 2_496663791  | 121.59 | 3_252652374    | 111.92 | M_80588_361   | 127.77 | 3HS_38438843   | 167.04 | 6_142602565   | 143.96 | 7HS_21525102 | 117.64 |
| 1H_84570760   | 119.19 | 2_514353957  | 122.98 | 3_222316683    | 112.65 | 4_98701946    | 128.40 | M_224427_816   | 168.07 | 6_36795707    | 144.55 | 7HS_31095616 | 118.03 |
| 1_38969627    | 120.10 | 2HL_13648618 | 123.44 | 3HS_26700700   | 113.38 | 5HS_25881971  | 129.34 | 5HL_31814320   | 168.65 | 6HS_14342863  | 145.11 | 7_262149691  | 118.25 |
| 1_41975622    | 120.91 | 2HL_13649329 | 123.73 | 3HL_4462181    | 113.47 | 4HS_17482435  | 129.83 | 5HL_44103275   | 168.90 | 6_148316429   | 145.64 | 7_234342476  | 118.32 |
| 1_30871398    | 125.97 | 2_521439621  | 124.30 | 3HL_36837491   | 114.43 | Ebmag781      | 130.58 | 5_342998304    | 169.13 | 7HL_32848991  | 146.41 | 7HS_39680044 | 118.80 |
| 1H_74333028   | 126.63 | 2HL_7395625  | 124.44 | M_121700_1366  | 115.34 | 4HS_6004759   | 131.17 | 5_370389808    | 169.55 | 6HS_13065896  | 146.99 | 7_268311781  | 119.01 |
| 1_12786191    | 127.55 | 2HL_18970523 | 124.60 | 2HS_36129225   | 116.01 | 4HS_18042559  | 131.71 | 5HL_35148946   | 170.23 | 6HS_32749126  | 148.38 | 7HS_29124063 | 119.36 |
| 1_19877648    | 128.19 | 2HL_22930294 | 125.19 | 6HS_30881605   | 116.94 | 4_93134040    | 133.02 | 5HL_23372706   | 171.03 | GMS6          | 150.15 | 7HS_423705   | 119.41 |

|               |        |               |        |                |        |               |        |                |        |               |        |               |        |
|---------------|--------|---------------|--------|----------------|--------|---------------|--------|----------------|--------|---------------|--------|---------------|--------|
| 1H_40868061   | 128.38 | 2_527241334   | 126.00 | 3HS_13376040   | 117.58 | 4_244618842   | 133.77 | 5HL_36403860   | 172.37 | 3HL_21642944  | 150.69 | 7HL_22161891  | 120.40 |
| 1H_75978121   | 128.74 | 2HL_22930005  | 126.97 | 3_106355000    | 118.02 | 4_48614035    | 135.18 | 1H_59344714    | 173.76 | M_229673_418  | 151.02 | 7HS_6744377   | 121.40 |
| 1_21963834    | 130.83 | 2HL_17075593  | 127.35 | M_56999_3219   | 118.23 | M_1574682_242 | 135.73 | M_1577838_3038 | 174.20 | 6HS_14944477  | 152.41 | 7HS_21726812  | 122.12 |
| 1H_55583778   | 132.59 | 2_522610509   | 127.96 | 3_122822375    | 118.92 | 4_48624357    | 136.43 | Bmag337        | 175.56 | 6HS_27140927  | 152.87 | M_325776_4784 | 122.52 |
| 1_19825452    | 133.38 | 2HL_34260490  | 128.68 | 3HS_7624882    | 119.74 | 4_45907643    | 137.78 | HvLEu          | 177.30 | 6HS_14897087  | 152.98 | M_104409_1533 | 122.82 |
| M_1574335_133 | 139.12 | 2_524782265   | 129.63 | 3HS_26938494   | 120.28 | M_232034_80   | 138.68 | M_188794_1190  | 178.50 | 1H_70160136   | 153.07 | 7HL_33754146  | 122.97 |
| 1_11525078    | 140.83 | 2HL_41874761  | 131.10 | M_1573468_3132 | 120.71 | 4HS_14418535  | 139.16 | 5HL_3126208    | 178.91 | 6HS_27453116  | 153.62 | 7HS_13114449  | 123.12 |
| 1H_30210492   | 141.25 | 2_531230596   | 131.46 | M_123041_952   | 120.85 | 4HS_16506867  | 139.44 | 5_221233297    | 179.35 | M_1619409_276 | 153.98 | 7HL_32655325  | 123.24 |
| 1H_11559496   | 141.53 | 2HL_43143355  | 132.50 | 3HS_25731240   | 121.43 | 4_42378533    | 139.62 | M_320650_521   | 179.88 | 6HS_13955828  | 154.31 | 7_394187342   | 123.33 |
| 1_9928110     | 141.81 | 2_534686550   | 132.96 | 4_45462104     | 121.91 | 4_26092518    | 142.50 | 5HL_23991301   | 180.52 | 6_61157407    | 154.53 | 7_325705605   | 123.37 |
| 1_2849437     | 143.17 | M_149956_1482 | 133.61 | 3HS_35126372   | 122.47 | 4_28741355    | 143.67 | M_320650_528   | 180.90 | 6HS_12971159  | 154.75 | 7_394184659   | 123.37 |
| 1H_2745781    | 145.04 | M_165611_94   | 136.79 | 3HS_14955052   | 123.22 | 4HS_32009949  | 145.47 | 5_429870353    | 183.82 | 6_61144426    | 154.93 | 7_202879929   | 123.37 |
| ;ENDOFGROUP   |        | 2_535589467   | 137.42 | 3HS_25915649   | 124.17 | 4_19543214    | 146.25 | 5HL_37078543   | 185.37 | 6HS_26273874  | 155.11 | 7_311871132   | 123.44 |
|               |        | 1H_83810983   | 137.73 | 3HS_35585265   | 124.54 | 3HL_12431542  | 146.39 | 5HL_8494280    | 185.79 | 1H_83380277   | 155.77 | 7_380865149   | 123.56 |
|               |        | 2_540559791   | 138.18 | 7HL_39841684   | 125.10 | M_153521_1223 | 146.50 | 5HL_11658154   | 186.14 | 6HS_25779094  | 156.13 | M_129326_472  | 123.77 |
|               |        | 2HL_766321    | 138.78 | 3_142888281    | 125.58 | M_1605646_794 | 146.57 | 5HL_33815718   | 186.64 | 6HS_16621012  | 156.26 | 7HS_32890650  | 124.12 |
|               |        | 2_544135082   | 139.15 | M_224438_795   | 126.79 | 4HS_38761945  | 146.67 | 5_412651332    | 187.53 | 4_399455275   | 156.36 | 7HS_20285665  | 124.45 |
|               |        | 2HL_23978934  | 139.58 | 3HS_8199020    | 127.31 | 4_16553551    | 147.72 | 5_416204256    | 188.80 | 6_49398767    | 158.65 | 7HL_24981369  | 124.83 |
|               |        | 2HL_37245721  | 140.32 | 3HS_35241834   | 127.45 | 4HS_28564347  | 148.36 | 5_417419714    | 188.96 | 6_51238374    | 159.56 | 7_394208044   | 125.10 |
|               |        | 2HL_31619458  | 141.75 | 3HS_38268253   | 127.59 | M_2553137_482 | 151.34 | 5_415005971    | 189.34 | 6_53661541    | 159.78 | 1H_81411360   | 125.82 |
|               |        | 2HL_23067013  | 142.99 | 3HS_34810522   | 127.70 | 4_16819133    | 151.97 | M_148497_192   | 189.73 | Bmag103       | 160.21 | 7HS_26227899  | 126.49 |
|               |        | 2_561951308   | 143.88 | 3HS_19353169   | 127.89 | 4HS_9277108   | 156.16 | 5_428226858    | 194.01 | GBM1212       | 161.04 | 7_348795436   | 127.19 |
|               |        | 2HL_44347520  | 144.58 | 3HS_30849038   | 128.43 | HvM40         | 156.31 | 5HL_1829158    | 194.86 | 6_33577280    | 161.92 | 7HS_15303153  | 127.72 |
|               |        | 2HL_20046952  | 145.57 | 3_168355506    | 129.32 | 4_12041406    | 156.45 | 5_424540233    | 196.96 | 6_47097505    | 162.71 | 7_291301444   | 128.35 |
|               |        | 2_558613423   | 147.31 | 3HS_25993959   | 129.57 | 4HS_38146635  | 156.57 | 5HL_12771179   | 199.63 | 6_44153505    | 163.07 | 7HS_27437325  | 129.02 |

|  |  |              |        |               |        |               |        |               |        |               |        |               |        |
|--|--|--------------|--------|---------------|--------|---------------|--------|---------------|--------|---------------|--------|---------------|--------|
|  |  | 2_576439205  | 157.20 | 3_168380765   | 130.02 | M_120736_1101 | 156.69 | 5_438033432   | 201.50 | M_63492_429   | 163.59 | 7HS_31297929  | 129.52 |
|  |  | 1H_58333588  | 158.79 | 3_164913353   | 130.83 | 4HS_21913031  | 157.59 | 5HL_6105296   | 202.20 | 6HS_25127741  | 168.20 | 7HS_25905506  | 130.00 |
|  |  | 2HL_28631837 | 159.76 | 3_151654877   | 131.25 | 4_8019773     | 158.06 | 5_226253827   | 202.87 | M_139325_912  | 168.64 | 7HS_35889676  | 130.18 |
|  |  | 2HL_34903597 | 160.76 | M_166308_3474 | 131.99 | 4_8073993     | 158.50 | 5_436205970   | 203.25 | 6_29134076    | 169.32 | 7HS_30003071  | 130.93 |
|  |  | M_537170_780 | 161.45 | 3HS_32884333  | 132.41 | M_1611184_441 | 161.19 | 5_435781539   | 203.83 | 6HS_6762219   | 169.59 | 7HS_21578173  | 131.12 |
|  |  | 2HL_18227895 | 161.99 | 3HS_31172493  | 133.10 | M_1635498_753 | 161.91 | 5HL_25802367  | 207.85 | M_255849_392  | 170.35 | M_152709_1608 | 131.32 |
|  |  | 2_579576154  | 162.44 | 3HL_9800712   | 133.41 | M_282112_578  | 162.79 | 5_443547683   | 208.36 | 6_25200756    | 171.27 | 7_265172609   | 131.66 |
|  |  | 2_568727199  | 163.27 | 3_342720039   | 133.74 | 4_3860802     | 164.17 | 5HL_37477531  | 208.95 | GBM1215       | 172.36 | 7HS_22488622  | 131.97 |
|  |  | 2HL_13810728 | 164.31 | 4HL_23236962  | 134.36 |               |        | 5_442118440   | 209.47 | 6_24969652    | 172.75 | M_107505_2072 | 132.59 |
|  |  | 2_578947595  | 165.30 | 3HS_15347221  | 134.78 |               |        | 5_450805227   | 209.95 | M_279413_743  | 173.11 | 7HS_17906516  | 133.19 |
|  |  | 2_585157702  | 166.22 | 4HL_51597838  | 135.47 |               |        | 5_441132308   | 210.45 | 3HL_48888709  | 173.41 | M_101938_837  | 134.41 |
|  |  | M_1020_157   | 166.97 | M_114292_1468 | 136.07 |               |        | M_200683_71   | 212.15 | 6HS_23958993  | 176.36 | 7HS_33828406  | 135.00 |
|  |  | Ebmag793     | 170.04 | M_169425_661  | 137.09 |               |        | M_133537_1411 | 213.81 | 2_625859552   | 176.91 | 7HS_12989483  | 135.05 |
|  |  | GBM1149      | 170.87 | 3HL_28233421  | 137.83 |               |        | 5_455691597   | 214.70 | 6HS_34488883  | 178.47 | 7_382544975   | 135.36 |
|  |  | 2_588819729  | 175.09 | 3_202935520   | 137.97 |               |        | 2_91618222    | 215.29 | 6_14536026    | 179.49 | 7HS_29196961  | 136.21 |
|  |  | 2_588885691  | 175.90 | 3HL_9802508   | 138.53 |               |        | 5_460258834   | 216.96 | Bmag500       | 179.68 | M_126443_1107 | 137.28 |
|  |  | 2HL_14160939 | 176.99 | 3HL_30415730  | 138.95 |               |        | 5_460285749   | 217.82 | M_195029_1219 | 180.91 | 7HS_8348321   | 138.20 |
|  |  | 2_588885698  | 177.68 | 3HL_12333356  | 139.37 |               |        | 5HL_15003501  | 218.19 | M_95671_1878  | 183.20 | 1H_61339959   | 138.27 |
|  |  | 2_598440313  | 183.47 | M_1804790_860 | 140.03 |               |        | 5_464856478   | 218.60 | 6HS_10274897  | 183.70 | 4HL_50830351  | 138.91 |
|  |  | 2HL_19715945 | 183.83 | 3HL_6125197   | 140.09 |               |        | M_1573849_850 | 218.93 | 3HS_30515537  | 184.32 | 7_319506952   | 139.84 |
|  |  | 2_598509820  | 184.06 | M_149429_1285 | 140.68 |               |        | 5_457074676   | 219.20 | 6HS_7381030   | 185.43 | 7HL_28498244  | 140.52 |
|  |  | 2_598551866  | 184.64 | 3_117331152   | 141.08 |               |        | 5_472488768   | 223.12 | 6HS_23929119  | 188.54 | 7_332338124   | 141.21 |
|  |  | 2_594496551  | 184.94 | 3_212034112   | 141.51 |               |        | 5_475126791   | 223.69 | 6HS_10046074  | 189.38 | 7HL_18225538  | 141.35 |
|  |  | 2_598635476  | 185.41 | M_106257_1414 | 142.25 |               |        |               |        | 6HS_15502602  | 189.64 | 7_266426884   | 141.78 |
|  |  | 2_599214360  | 186.97 | 3HL_2971556   | 142.72 |               |        |               |        | 6HS_5930053   | 195.77 | 7HL_38122468  | 141.93 |

|  |  |             |        |               |        |  |  |  |  |              |        |               |        |
|--|--|-------------|--------|---------------|--------|--|--|--|--|--------------|--------|---------------|--------|
|  |  | 2_598741132 | 187.57 | 3_228358690   | 143.15 |  |  |  |  | M_285479_975 | 196.56 | 7_363854703   | 142.10 |
|  |  | 2_600701693 | 188.30 | 3HS_32545487  | 143.51 |  |  |  |  |              |        | M_249458_259  | 142.26 |
|  |  |             |        | 3_260593928   | 144.54 |  |  |  |  |              |        | 7HS_4123979   | 142.42 |
|  |  |             |        | 4HL_14912109  | 145.33 |  |  |  |  |              |        | 7HS_11473727  | 142.53 |
|  |  |             |        | 3_195437549   | 146.06 |  |  |  |  |              |        | 7HL_32593133  | 142.60 |
|  |  |             |        | 3_85361523    | 146.60 |  |  |  |  |              |        | M_378389_1034 | 142.65 |
|  |  |             |        | 3HL_17901650  | 147.31 |  |  |  |  |              |        | 7HL_34691420  | 142.65 |
|  |  |             |        | 3_115656388   | 148.06 |  |  |  |  |              |        | M_197346_1107 | 142.65 |
|  |  |             |        | 3HL_39867477  | 148.61 |  |  |  |  |              |        | 7_242293096   | 142.65 |
|  |  |             |        | 3HL_46409485  | 149.04 |  |  |  |  |              |        | M_95954_1839  | 142.65 |
|  |  |             |        | 3_252656251   | 149.61 |  |  |  |  |              |        | 7HL_19514027  | 142.69 |
|  |  |             |        | 3HL_4528686   | 150.19 |  |  |  |  |              |        | 7HS_23764153  | 142.74 |
|  |  |             |        | M_124614_1992 | 150.53 |  |  |  |  |              |        | 7_231161159   | 142.82 |
|  |  |             |        | 3HL_36459271  | 150.92 |  |  |  |  |              |        | 7HL_19464259  | 142.92 |
|  |  |             |        | 3HL_17169545  | 151.05 |  |  |  |  |              |        | 7HL_19514020  | 143.01 |
|  |  |             |        | M_170332_914  | 151.42 |  |  |  |  |              |        | 7_379313804   | 143.11 |
|  |  |             |        | 3_117329141   | 152.07 |  |  |  |  |              |        | 7HL_39611722  | 143.24 |
|  |  |             |        | 3HS_1849547   | 152.62 |  |  |  |  |              |        | 7HS_28646469  | 143.39 |
|  |  |             |        | 3HL_6035493   | 152.94 |  |  |  |  |              |        | 7_275021515   | 143.76 |
|  |  |             |        | 3HS_26388351  | 153.15 |  |  |  |  |              |        | 7_253830472   | 144.07 |
|  |  |             |        | 3HS_35720654  | 153.30 |  |  |  |  |              |        | 7HL_41207635  | 144.41 |
|  |  |             |        | M_68399_2570  | 153.40 |  |  |  |  |              |        | 7HS_18303337  | 145.06 |
|  |  |             |        | 3_232531541   | 153.55 |  |  |  |  |              |        | 7HS_38071125  | 146.07 |
|  |  |             |        | 3HS_29284311  | 153.76 |  |  |  |  |              |        | 5HL_40328673  | 146.86 |
|  |  |             |        | 3HS_21692681  | 153.91 |  |  |  |  |              |        | 7_197072870   | 147.60 |

|  |  |  |  |              |        |  |  |  |  |  |               |        |
|--|--|--|--|--------------|--------|--|--|--|--|--|---------------|--------|
|  |  |  |  | 3_260516488  | 154.02 |  |  |  |  |  | 7HL_1406395   | 148.00 |
|  |  |  |  | 3HL_22314417 | 154.08 |  |  |  |  |  | M_164402_210  | 148.40 |
|  |  |  |  | 3HL_45008247 | 154.15 |  |  |  |  |  | 7HL_36320136  | 149.07 |
|  |  |  |  | 3HL_33458679 | 154.24 |  |  |  |  |  | M_96111_1679  | 149.42 |
|  |  |  |  | 3HS_14684481 | 154.37 |  |  |  |  |  | 7HL_6335336   | 150.11 |
|  |  |  |  | 3HS_10098927 | 154.53 |  |  |  |  |  | Bmac31        | 151.09 |
|  |  |  |  | 3HL_22346532 | 154.73 |  |  |  |  |  | 7_249275418   | 151.48 |
|  |  |  |  | 3HS_36183965 | 155.01 |  |  |  |  |  | Bmac167       | 151.48 |
|  |  |  |  | 3_230154353  | 155.32 |  |  |  |  |  | Bmag217       | 151.48 |
|  |  |  |  | 3HS_33787164 | 155.52 |  |  |  |  |  | 2_287569753   | 151.92 |
|  |  |  |  | 3HS_20423735 | 155.92 |  |  |  |  |  | 7HL_29535430  | 152.24 |
|  |  |  |  | 3_351352181  | 156.25 |  |  |  |  |  | M_90598_706   | 152.84 |
|  |  |  |  | 3HL_49792701 | 156.48 |  |  |  |  |  | 6HL_26291109  | 153.44 |
|  |  |  |  | 3HS_8311834  | 156.62 |  |  |  |  |  | M_1645585_244 | 154.04 |
|  |  |  |  | 3_175635979  | 156.71 |  |  |  |  |  | 7HS_25585637  | 154.94 |
|  |  |  |  | M_286283_706 | 156.77 |  |  |  |  |  | 7_169171765   | 155.79 |
|  |  |  |  | 3HL_26275170 | 156.83 |  |  |  |  |  | M_92577_622   | 156.15 |
|  |  |  |  | 3HL_38044646 | 156.89 |  |  |  |  |  | 2HS_16886086  | 156.50 |
|  |  |  |  | 3_564584365  | 156.94 |  |  |  |  |  | M_231959_191  | 157.12 |
|  |  |  |  | M_189878_37  | 156.94 |  |  |  |  |  | 7HS_30953596  | 158.65 |
|  |  |  |  | 3HS_21357171 | 156.94 |  |  |  |  |  | M_225539_34   | 159.11 |
|  |  |  |  | 3HL_35306249 | 156.99 |  |  |  |  |  | 7_227758562   | 159.88 |
|  |  |  |  | 3HS_1055659  | 157.07 |  |  |  |  |  | 7_276875544   | 160.01 |
|  |  |  |  | M_363498_76  | 157.14 |  |  |  |  |  | M_247532_1263 | 160.15 |
|  |  |  |  | 3_327391418  | 157.23 |  |  |  |  |  | 7HS_29625706  | 160.40 |



|  |  |  |               |        |  |  |  |  |  |              |        |
|--|--|--|---------------|--------|--|--|--|--|--|--------------|--------|
|  |  |  | M_201196_1098 | 168.67 |  |  |  |  |  | 7_144173681  | 174.98 |
|  |  |  | 3_201938731   | 169.50 |  |  |  |  |  | 7HS_24288175 | 175.26 |
|  |  |  | 3_275423042   | 169.89 |  |  |  |  |  | 7HS_16914589 | 175.79 |
|  |  |  | 3_195703173   | 170.22 |  |  |  |  |  | 7HS_24124059 | 177.72 |
|  |  |  | 3HL_31281289  | 170.94 |  |  |  |  |  | 7_175785765  | 177.87 |
|  |  |  | 3HL_34232600  | 171.44 |  |  |  |  |  | 7_115993906  | 178.52 |
|  |  |  | 3HL_14019093  | 171.79 |  |  |  |  |  | M_221260_990 | 179.12 |
|  |  |  | 3HL_46099559  | 172.22 |  |  |  |  |  | 7_135299038  | 179.43 |
|  |  |  | 3_205578288   | 172.68 |  |  |  |  |  | 7HS_24633706 | 179.63 |
|  |  |  | 3HL_38526556  | 173.31 |  |  |  |  |  | 7HS_16458224 | 180.01 |
|  |  |  | 3HL_45008254  | 174.27 |  |  |  |  |  | 7HS_39727659 | 180.69 |
|  |  |  | 3HL_25942927  | 175.76 |  |  |  |  |  | 7HS_7499702  | 181.04 |
|  |  |  | 3HL_47239478  | 177.30 |  |  |  |  |  | 7_100916612  | 181.14 |
|  |  |  | 3_254103649   | 178.55 |  |  |  |  |  | 7HS_23607469 | 181.34 |
|  |  |  | M_2562830_280 | 179.17 |  |  |  |  |  | 7HS_33683527 | 183.45 |
|  |  |  | 3_421573021   | 179.90 |  |  |  |  |  | 7_247969253  | 183.45 |
|  |  |  | 3HL_40793534  | 180.29 |  |  |  |  |  | 7HS_21827941 | 183.75 |
|  |  |  | 3HL_10764412  | 180.43 |  |  |  |  |  | 7HS_30257307 | 184.08 |
|  |  |  | 3HL_41163989  | 180.55 |  |  |  |  |  | 7_87591581   | 184.55 |
|  |  |  | 3HL_8294472   | 180.90 |  |  |  |  |  | 7_74542996   | 184.93 |
|  |  |  | 3HS_22869183  | 181.26 |  |  |  |  |  | 7HS_10887541 | 184.97 |
|  |  |  | 3HL_9800668   | 181.65 |  |  |  |  |  | 7_81565191   | 184.97 |
|  |  |  | 3HL_18994954  | 182.22 |  |  |  |  |  | 7HS_15526962 | 185.10 |
|  |  |  | 3_426707684   | 183.63 |  |  |  |  |  | 7_68207046   | 185.27 |
|  |  |  | M_171790_606  | 184.99 |  |  |  |  |  | 3HS_37315153 | 185.43 |

|  |  |  |               |        |  |  |  |  |  |              |        |
|--|--|--|---------------|--------|--|--|--|--|--|--------------|--------|
|  |  |  | 4_261711184   | 185.59 |  |  |  |  |  | M_128508_616 | 185.70 |
|  |  |  | 3_168429388   | 186.33 |  |  |  |  |  | 7_74542989   | 186.23 |
|  |  |  | M_174364_930  | 186.59 |  |  |  |  |  | 7_92359522   | 186.64 |
|  |  |  | Bmag6         | 187.79 |  |  |  |  |  | 7_77944466   | 187.22 |
|  |  |  | Bmac67        | 188.40 |  |  |  |  |  | 7_75744987   | 190.07 |
|  |  |  | M_168364_1478 | 190.30 |  |  |  |  |  | 7_68192567   | 191.39 |
|  |  |  | 3HS_28871858  | 191.42 |  |  |  |  |  | 7_66854471   | 192.72 |
|  |  |  | 3HS_23529315  | 192.01 |  |  |  |  |  | 7_71636075   | 193.32 |
|  |  |  | M_157760_958  | 192.97 |  |  |  |  |  | 7HS_25923987 | 194.50 |
|  |  |  | 3HS_5478941   | 193.44 |  |  |  |  |  | 7_57335292   | 196.01 |
|  |  |  | 3_74018396    | 193.82 |  |  |  |  |  | 7_57335299   | 196.23 |
|  |  |  | 3HS_3937648   | 202.64 |  |  |  |  |  | 7_54057035   | 197.84 |
|  |  |  | 3HS_7709043   | 202.95 |  |  |  |  |  | Bmag914      | 198.99 |
|  |  |  | 3_34191994    | 204.49 |  |  |  |  |  | 7_52685324   | 199.11 |
|  |  |  | 3HS_1093997   | 205.74 |  |  |  |  |  | 7_52555807   | 199.56 |
|  |  |  | 3_28890185    | 207.01 |  |  |  |  |  | 7HS_2758449  | 200.45 |
|  |  |  | 2HL_24653676  | 208.25 |  |  |  |  |  | 7_46081414   | 201.19 |
|  |  |  | 3_28198240    | 209.20 |  |  |  |  |  | 5HL_38629580 | 201.34 |
|  |  |  | M_112120_1515 | 211.32 |  |  |  |  |  | 7_41328131   | 204.52 |
|  |  |  | 3_28802747    | 211.43 |  |  |  |  |  | 4HL_41496393 | 205.01 |
|  |  |  | 3_26035945    | 211.60 |  |  |  |  |  | 2_406786591  | 205.52 |
|  |  |  | 3_28844640    | 212.04 |  |  |  |  |  | 7_28180247   | 208.12 |
|  |  |  | 3_19138070    | 215.17 |  |  |  |  |  | 7_31360519   | 208.78 |
|  |  |  | 3_18321105    | 215.90 |  |  |  |  |  | 7_28180957   | 209.43 |
|  |  |  | 3_12801553    | 217.97 |  |  |  |  |  | 7_30270714   | 210.11 |



|  |  |  |              |        |  |  |  |  |  |               |        |
|--|--|--|--------------|--------|--|--|--|--|--|---------------|--------|
|  |  |  | 3_10879419   | 219.05 |  |  |  |  |  | 7HS_22579543  | 210.32 |
|  |  |  | 3HS_23386841 | 219.59 |  |  |  |  |  | 7_24915439    | 212.18 |
|  |  |  | 3_13048803   | 220.35 |  |  |  |  |  | 7_24487536    | 212.80 |
|  |  |  | 3_9347910    | 222.03 |  |  |  |  |  | 7_24486635    | 213.15 |
|  |  |  | 3HS_5193202  | 222.47 |  |  |  |  |  | 7_15215651    | 216.99 |
|  |  |  | 3HS_5195766  | 222.91 |  |  |  |  |  | 7_18054889    | 217.33 |
|  |  |  | 3_8289337    | 224.21 |  |  |  |  |  | 7_16284976    | 217.52 |
|  |  |  | 3_8275167    | 224.73 |  |  |  |  |  | 7HS_25179223  | 217.82 |
|  |  |  | 3_6555065    | 226.08 |  |  |  |  |  | 7_17975812    | 218.12 |
|  |  |  | 3_3120137    | 226.76 |  |  |  |  |  | M_188044_1595 | 218.30 |
|  |  |  | 3_5294954    | 228.53 |  |  |  |  |  | M_137201_2559 | 218.43 |
|  |  |  | M_92173_5387 | 229.65 |  |  |  |  |  | 7_16284969    | 218.51 |
|  |  |  | GBM1280      | 230.90 |  |  |  |  |  | 7_13793206    | 218.87 |
|  |  |  |              |        |  |  |  |  |  | 7_5696029     | 219.10 |
|  |  |  |              |        |  |  |  |  |  | 7HS_41263643  | 219.35 |
|  |  |  |              |        |  |  |  |  |  | Bmag206       | 219.65 |
|  |  |  |              |        |  |  |  |  |  | 7_11478211    | 222.36 |
|  |  |  |              |        |  |  |  |  |  | 7_11445098    | 223.03 |
|  |  |  |              |        |  |  |  |  |  | 7_5257716     | 224.09 |
|  |  |  |              |        |  |  |  |  |  | 7_2869142     | 224.41 |
|  |  |  |              |        |  |  |  |  |  | M_94859_1021  | 224.67 |
|  |  |  |              |        |  |  |  |  |  | 7HS_22537347  | 225.53 |
|  |  |  |              |        |  |  |  |  |  | 7_5539511     | 226.07 |
|  |  |  |              |        |  |  |  |  |  | 7_2135815     | 227.14 |
